# Supplementary material
Source: Research Square preprint supplement (doi:10.21203/rs.3.rs-9488315/v1)
Supplement: Supplementary file 1 [file 1bfcef355eda3a939f83cb1c.xlsx]

## Sheet: ST Summary
Supplementary Tables Summary	Abbreviation	Supplementary Tables Descriptions
Descriptive statististics and general characteristics of cross-sectional studies	ST1	Summary of study characteristics of the 37 cross-sectional investigations included in the present analysis, including sample size, sex distribution, age range, control design, disease or phenotype classification, and analytical approaches used for IgG glycome profiling.
Cohort-specific general linear model estimates of associations between disease status and IgG glycome traits in cross-sectional studies	ST2	Effect represents the regression coefficient (β) obtained from cohort-specific general linear models. For disease cohorts, β reflects the difference in standardized glycan trait between cases and controls (reference = controls). For 4 aging cohorts, β represents the change in glycan trait per decade increase in chronological age. Models were adjusted for age and sex (except aging cohorts). False …
Association between glycan age and risk of overall mortality in the GCKD cohort: Cox proportional hazards models with sequential adjustment	ST3	Hazard ratios (HR) and 95% confidence intervals (CI) were estimated using Cox proportional hazards models with survivors censored at last follow-up. M0: unadjusted model. M1: adjusted for age and sex. M2: additionally adjusted for BMI, smoking status, systolic blood pressure, LDL cholesterol, cardiovascular disease, and diabetes. M3: further adjusted for C-reactive protein. M4: additionally adjus…
Detailed Cox proportional hazards regression results for overall mortality in the GCKD cohort	ST4	The table includes model coefficients (β), hazard ratios (exp(β)), standard errors, 95% confidence intervals, and p-values across sequential adjustment models (M0–M4, as defined in ST3). Survivors were censored at last follow-up (maximum 8.5 years). Continuous laboratory variables were log-transformed where appropriate. Analyses were restricted to participants with complete covariate data (N = 4,…
Detailed Cox proportional hazards regression results for overall mortality in the Vis cohort	ST5	The table presents model coefficients (β), hazard ratios (exp(β)), standard errors (SE), 95% confidence intervals (CI), and p-values across sequential adjustment models (M0–M3, as defined in ST3). Follow-up time was 10 years. eGFR and UACR were not available in the Vis cohort and were therefore not included in the models.
Mean glycan age according to survival status within strata of chronological age in the GCKD and Vis cohorts	ST6	The table presents the mean glycan age (GA) among participants who survived (control) and those who died (case) during follow-up, stratified by baseline chronological age groups. N denotes the number of participants in each subgroup. P values correspond to comparisons of glycan age between survivors and deceased individuals within each age stratum. Cohorts are shown separately.
Descriptive characteristics of participants in the menopause study from the Vis and Korčula cohorts	ST7	The table presents descriptive statistics for women included in the menopause study from the Korčula and Vis cohorts. Results are shown separately for the full sample (“All”) and the age-matched subsets (“Matched”), stratified by menopausal status (No = premenopausal; Yes = postmenopausal). Continuous variables are presented as median (Q1, Q3) and minimum–maximum values. Categorical variables are…
Overview of participants and sampling structure in the hormone replacement therapy (HRT) study	ST8	The table summarizes longitudinal samples collected from participants included in the hormone replacement therapy (HRT) study. For each sample, the date of collection, study subject identifier, sample identifier, use of exogenous hormones (estrogen, progesterone, testosterone), menopausal status at sampling (perimenopause, natural menopause, or surgical menopause), and chronological age are shown…
Descriptive characteristics of participants in the intervention studies	ST9	The table summarizes demographic characteristics of participants included in the intervention studies, including hormone replacement therapy (HRT), therapeutic plasma exchange (TPE), and caloric restriction (Diogenes study). Results are presented separately by study site and sex. For each subgroup, N (type) denotes the number of participants of the given sex, and N (total) the total number of par…
Effects of interventions on glycan age assessed by linear mixed-effects models	ST10	The table presents estimated effects of time on glycan age in the intervention studies, including hormone replacement therapy (HRT), therapeutic plasma exchange (TPE), and caloric restriction (Diogenes study). Reported values represent regression coefficients (Effect), standard errors (SE), and corresponding p-values from linear mixed-effects models. Negative coefficients indicate a decrease in g…
Overview of participants and sampling structure in the therapeutic plasma exchange (TPE) study	ST11	The table summarizes longitudinal samples collected from participants undergoing therapeutic plasma exchange (TPE). For each sample, the sample identifier, study subject identifier, sex, chronological age at sampling, date of sample collection, intervention start date, and time since intervention initiation (in days and months) are presented. Time variables (days and months) indicate the interval…
Descriptive characteristics of participants included in the BMI study from the Korčula and Vis cohorts	ST12	The table presents descriptive statistics of participants from the Korčula and Vis cohorts included in the BMI analysis, stratified by sex. Sample sizes for each subgroup are indicated in the column headers. Continuous variables are presented as median (Q1, Q3) and minimum–maximum values. Categorical variables are presented as counts (percentages).
Association between BMI and glycan age in the pooled cohort analysis	ST13	The table presents regression coefficients (β), 95% confidence intervals (95% CI), and p-values from a linear mixed-effects model evaluating the association between BMI and glycan age. The model included age, BMI, and their interaction term (age × BMI) as fixed effects, with cohort included as a random intercept.
Age-stratified effect of BMI on glycan age	ST14	The table presents estimated changes in glycan age per 1 kg/m² increase in BMI across selected ages, derived from the interaction model shown in ST13. Values are reported as estimated marginal effects (95% CI) with corresponding p-values.

## Sheet: ST1
ST1: Descriptive statististics and general characteristics of cross-sectional studies. Summary characteristics of included cross-sectional studies assessing IgG glycosylation across different diseases and aging. For each study, total sample size and subgroup size (control/case), sex distribution, and age (mean, minimum (min), maximum (max)) are reported for the overall cohort and by subgroup. Con…
Study	Type	N (total)	N (type)	Female (total)	Female (type)	Female (%, total)	Female (%, type)	Age (mean, total)	Age (mean, type)	Age (min, total)	Age (min, type)	Age (max, total)	Age (max, type)	Control design	Observed phenomenon/disease	Type of IgG glycome analysed	Method	Reference
SLE1	Control	301	193	277	179	92.03	92.75	47.71	47.96	24.00	24.00	81.00	81.00	healthy controls	Systemic lupus erythematosus	Total released N glycans	UHPLC	26200652
	Case		108		98		90.74		47.27		25.00		74.00
SLE2	Control	497	247	452	226	90.95	91.50	39.51	39.21	0.00	0.00	84.00	77.00	healthy controls		Total released N glycans	UHPLC	26200652
	Case		250		226		90.40		39.79		0.00		84.00
SLE3	Control	223	117	188	89	84.30	76.07	37.16	37.63	14.00	19.00	73.00	68.00	healthy controls		Total released N glycans	UHPLC	26200652
	Case		106		99		93.40		36.64		14.00		73.00
SLE4	Control	249	197	133	86	53.41	43.65	46.55	46.34	33.00	33.00	64.00	64.00	non-inflammatory CVD		Subclass specific Fc glycopeptides	LC-MS	-
	Case		52		47		90.38		47.33		33.00		64.00
UC1	Control	530	120	318	79	60.00	65.83	44.92	42.10	17.00	19.00	84.00	77.00	healthy controls	Ulcerative colitis	Total released N glycans	UHPLC	25895110
	Case		410		239		58.29		45.75		17.00		84.00
UC2	Control	760	380	460	238	60.53	62.63	46.64	47.43	11.00	18.00	84.00	84.00	healthy controls		Subclass specific Fc glycopeptides	LC-MS	29309774
	Case		380		222		58.42		45.84		11.00		81.00
UC3	Control	691	438	382	253	55.28	57.76	43.97	45.26	8.61	8.93	78.55	78.14	healthy controls		Subclass specific Fc glycopeptides	LC-MS	29309774
	Case		253		129		50.99		41.75		8.61		78.55
UC4	Control	268	197	121	86	45.15	43.65	46.29	46.34	33.00	33.00	64.00	64.00	non-inflammatory CVD		Subclass specific Fc glycopeptides	LC-MS	-
	Case		71		35		49.30		46.14		33.00		63.00
CD1	Control	407	120	262	79	64.37	65.83	43.14	42.10	17.00	19.00	85.00	77.00	healthy controls	Chron's disease	Total released N glycans	UHPLC	25895110
	Case		287		183		63.76		43.58		17.00		85.00
CD2	Control	760	380	485	248	63.82	65.26	44.38	46.01	7.00	18.00	86.00	86.00	healthy controls		Subclass specific Fc glycopeptides	LC-MS	29309774
	Case		380		237		62.37		42.75		7.00		83.00
CD3	Control	828	438	421	253	50.85	57.76	41.93	45.26	8.25	8.93	83.43	78.14	healthy controls		Subclass specific Fc glycopeptides	LC-MS	29309774
	Case		390		168		43.08		38.18		8.25		83.43
CD4	Control	296	197	149	86	50.34	43.65	46.59	46.34	33.00	33.00	64.00	64.00	non-inflammatory CVD		Subclass specific Fc glycopeptides	LC-MS	-
	Case		99		63		63.64		47.08		33.00		62.00
RA1	Control	272	143	209	99	76.84	69.23	49.71	48.44	10.00	20.00	77.00	68.00	healthy controls	Rheumatoid arthritis	Total released N glycans	UHPLC	27310476
	Case		129		110		85.27		51.12		10.00		77.00
RA2	Control	284	197	149	86	52.46	43.65	48.31	46.34	33.00	33.00	64.00	64.00	non-inflammatory CVD		Subclass specific Fc glycopeptides	LC-MS	-
	Case		87		63		72.41		52.77		33.00		64.00
RA3	Control	180	92	136	73	75.56	79.35	59.31	59.01	28	50	86	81	healthy controls		Total released N glycans	UHPLC - Rapifluor	-
	Case		88		63		71.59		59.63		28		86
HT1	Control	52	23	45	16	86.54	69.57	41.02	41.87	21.00	25.00	67.00	67.00	healthy controls	Hashimoto’s thyroiditis	Total released N glycans	UHPLC	32024769
	Case		29		29		100.00		40.34		21.00		62.00
PsA1	Control	300	197	140	86	46.67	43.65	47.36	46.34	33.00	33.00	64.00	64.00	non-inflammatory CVD	Psoriatic arthritis	Subclass specific Fc glycopeptides	LC-MS	-
	Case		103		54		52.43		49.30		33.00		64.00
MS1	Control	171	88	120	62	70.18	70.45	50.93	50.75	27.58	27.58	77.13	77.13	healthy controls	Multiple sclerosis	Subclass specific Fc glycopeptides	LC-MS	33065977
	Case		83		58		69.88		51.12		2025-01-29		76.91
SjD1	Control	220	92	193	73	87.73	79.35	58.79	59.01	24	50	93	81	healthy controls	Sjögren’s disease	Total released N glycans	UHPLC - Rapifluor	-
	Case		128		120		93.75		58.63		24		93
SSc1	Control	179	92	142	73	79.33	79.35	59.31	59.01	29	50	95	81	healthy controls	Systemic sclerosis	Total released N glycans	UHPLC - Rapifluor	-
	Case		87		69		79.31		59.63		29		95
GVHD1	Control	266	10	108	2	40.60	20.00	42.53	50.40	3.00	40.00	71.00	65.00	no cGvHD after transplantation	Graft-versus-host disease	Total released N glycans	UHPLC	34335560
	Case		256		106		41.41		42.23		3.00		71.00
GVHD2	Control	62	31	32	16	51.61	51.61	38.79	38.68	9.00	11.00	60.00	59.00	no GVHD after alloSCT		Total released N glycans	UHPLC	urn:nbn:hr:105:922441
	Case		31		16		51.61		38.90		9.00		60.00
COPD1	Control	207	146	115	95	55.56	65.07	53.95	50.81	39.51	39.51	74.92	69.76	healthy controls	Chronic obstructive pulmonary disease	Total released N glycans	UHPLC	30463578
	Case		61		20		32.79		61.48		40.15		74.92
COPD2	Control	230	94	97	46	42.17	48.94	64.64	63.16	44.00	46.00	86.00	83.00	healthy controls		Total released N glycans	UHPLC	30463578
	Case		136		51		37.50		65.66		44.00		86.00
AS1	Control	284	183	135	81	47.54	44.26	10.31	10.31	9.91	9.91	2025-07-11	2025-03-11	non-sensitized children	Allergic sensitization	Subclass specific Fc glycopeptides	LC-MS	27616597
	Case		101		54		53.47		10.32		9.92		2025-07-11
AS2	Control	537	369	256	198	47.67	53.66	7.83	7.65	3.00	3.00	11.00	11.00	non-sensitized children		Subclass specific Fc glycopeptides	LC-MS	27616597
	Case		168		58		34.52		8.21		4.00		11.00
CVD1	Control	4827	3367	1920	1509	39.78	44.82	60.10	57.99	18.00	18.00	76.00	76	no CVD with CKD	Cardiovascular disease	Total released N glycans	UHPLC	-
	Case		1460		411		28.15		64.98		23.00		75
CAD1	Control	318	159	74	44	23.27	27.67	62.24	61.03	45.10	45.10	75.90	74.70	no clinical manifestation of CAD	Coronary artery disease	Total released N glycans	UHPLC	36830744
	Case		159		30		18.87		63.44		47.00		75.90
HF1	Control	291	95	95	37	32.65	38.95	64.53	64.37	24.00	38.00	98.00	90.00	healthy controls	Heart failure	Total released N glycans	UHPLC	-
	Case		196		58		29.59		64.60		24.00		98.00
AF1	Control	224	53	82	19	36.61	35.85	61.89	61.98	27.00	38.00	80.00	75.00	healthy controls	Atrial fibrillation	Total released N glycans	UHPLC	37189353
	Case		171		63		36.84		61.86		27.00		80.00
DM1	Control	4827	3097	1920	1351	39.78	43.62	60.10	57.58	18.00	18.00	76.00	76.00	no DM with CKD	Diabetes mellitus	Total released N glycans	UHPLC	-
	Case		1730		569		32.89		64.62		27.00		75.00
T2D1	Control	2679	857	1348	511	50.32	59.63	65.33	65.76	27.00	41.00	94.00	90.00	no clinical manifestation of DM, impaired glucose tolerance or Cushing's disease	Type 2 diabetes	Total released N glycans	UHPLC	28668296
	Case		1822		837		45.94		65.13		27.00		94.00
CRC1	Control	1297	537	593	248	45.72	46.18	51.34	51.61	21.00	21.00	74.00	74.00	healthy controls	Colorectal carcinoma	Total released N glycans	UHPLC	26831718
	Case		760		345		45.39		51.15		21.00		60.00
Aging1	-	890	-	521	-	58.54	-	56.30	-	18.00	-	93.00	-	-	Age	Total released N glycans	UHPLC	24325898
	-		-		-		-		-		-		-
Aging2	-	915	-	595	-	65.03	-	56.24	-	18.00	-	98.00	-	-		Total released N glycans	UHPLC	24325898
	-		-		-		-		-		-		-
Aging3	-	2030	-	1236	-	60.89	-	53.18	-	16.50	-	100.18	-	-		Total released N glycans	UHPLC	24325898
	-		-		-		-		-		-		-
Aging4	-	1203	-	1201	-	99.83	-	58.69	-	27.28	-	83.44	-	-		Total released N glycans	UHPLC	24325898
	-		-		-		-		-		-		-

## Sheet: ST2
ST2: Cohort-specific general linear model estimates of associations between disease status and IgG glycome traits in cross-sectional studies. Associations between disease status and IgG glycome traits are shown for each cross-sectional study separately. Effect represents the regression coefficient (β) from cohort-specific general linear models. For disease cohorts, β reflects the difference in st…
Study	Variable	Effect	SE	P value	P value (adjusted)
SLE1	G0 total	0.502092	0.108544	5.58055e-06	1.46489e-05
SLE1	G1 total	-0.442367	0.117871	0.000210163	0.000458995
SLE1	G2 total	-0.513515	0.102776	9.98618e-07	2.81054e-06
SLE1	G total	-0.629675	0.107749	1.33986e-08	4.13896e-08
SLE1	S total	-0.203919	0.117298	0.0831649	0.119416
SLE1	B total	0.709026	0.108473	2.74023e-10	1.06363e-09
SLE1	F total	0.030297	0.120797	0.802134	0.823243
SLE1	glycan age	2.11436	0.589767	0.000393815	0.000839934
SLE2	G0 total	0.541663	0.0769964	6.70039e-12	2.95033e-11
SLE2	G1 total	-0.215965	0.0892827	0.0159288	0.0271786
SLE2	G2 total	-0.580652	0.075975	1.11907e-13	6.11015e-13
SLE2	G total	-0.591564	0.0776885	1.35987e-13	6.62937e-13
SLE2	S total	-0.334085	0.082207	5.61376e-05	0.000129878
SLE2	B total	0.829804	0.0746798	9.44855e-26	9.92097e-25
SLE2	F total	-0.312979	0.088287	0.000430005	0.000896117
SLE2	glycan age	3.45568	0.464141	4.34806e-13	2.28273e-12
SLE3	G0 total	0.705853	0.125902	6.18563e-08	1.94101e-07
SLE3	G1 total	-0.401304	0.127788	0.00191995	0.00382588
SLE3	G2 total	-0.622081	0.124669	1.23039e-06	3.42751e-06
SLE3	G total	-0.83394	0.126109	2.84159e-10	9.96154e-10
SLE3	S total	-0.406286	0.127918	0.00170753	0.00342762
SLE3	B total	1.02451	0.116894	5.25224e-16	3.77332e-15
SLE3	F total	-0.566519	0.13142	2.45915e-05	5.88901e-05
SLE3	glycan age	0.6827	0.496421	0.170461	0.222266
SLE4	G0 total	0.959019	0.136963	2.41387e-11	1.02967e-10
SLE4	G1 total	-0.218719	0.165966	0.188783	0.243102
SLE4	G2 total	-1.00143	0.133892	1.32964e-12	6.48201e-12
SLE4	G total	-0.892728	0.14469	2.806e-09	9.11949e-09
SLE4	S total	-0.8699	0.141155	2.919e-09	1.02165e-08
SLE4	B total	0.708199	0.150906	4.48148e-06	1.18781e-05
SLE4	F total	0.242982	0.168938	0.151627	0.199378
SLE4	glycan age	3.4537	0.470308	3.0714e-12	1.44568e-11
UC1	G0 total	0.322795	0.0857668	0.000186308	0.000413512
UC1	G1 total	-0.523973	0.101328	3.31385e-07	9.52295e-07
UC1	G2 total	-0.21908	0.0849778	0.0102058	0.0179753
UC1	G total	-0.400173	0.0887853	8.10259e-06	1.94462e-05
UC1	B total	0.125073	0.0866777	0.149624	0.198288
UC1	F total	0.138445	0.102671	0.1781	0.230433
UC1	glycan age	1.7971	0.703209	0.0108814	0.0190425
UC2	G0 total	0.175704	0.0669679	0.00887336	0.0158329
UC2	G1 total	-0.300067	0.0707714	2.5126e-05	5.9647e-05
UC2	G2 total	-0.0443871	0.0655018	0.498202	0.546222
UC2	G total	-0.174318	0.0670994	0.00956211	0.0163922
UC2	S total	0.0419042	0.0674755	0.534769	0.581641
UC2	B total	-0.370266	0.0660848	2.95351e-08	9.71455e-08
UC2	F total	-0.162981	0.072317	0.0245004	0.040537
UC2	glycan age	0.171056	0.345515	0.620691	0.656777
UC3	G0 total	0.585455	0.0688461	1.14231e-16	8.66255e-16
UC3	G1 total	-0.300587	0.0747623	6.44843e-05	0.000147935
UC3	G2 total	-0.459077	0.0680419	3.20919e-11	1.32744e-10
UC3	G total	-0.596512	0.0688357	3.20187e-17	2.27042e-16
UC3	S total	-0.317915	0.071627	1.05518e-05	2.66726e-05
UC3	B total	0.0760579	0.070594	0.281681	0.337275
UC3	F total	-0.0438236	0.07768	0.572833	0.615682
UC3	glycan age	2.31019	0.438841	1.8839e-07	5.47131e-07
UC4	G0 total	0.906642	0.108918	4.62266e-15	3.00473e-14
UC4	G1 total	-1.03087	0.122753	2.81789e-15	1.92321e-14
UC4	G2 total	-0.78472	0.109982	9.32877e-12	4.04247e-11
UC4	G total	-1.04025	0.111285	3.95812e-18	3.01203e-17
UC4	S total	-0.515935	0.118578	1.93836e-05	4.72475e-05
UC4	B total	-0.0260613	0.132083	0.843737	0.859478
UC4	F total	0.35932	0.135725	0.00859858	0.0154435
UC4	glycan age	0.853523	0.317604	0.00765894	0.0140328
CD1	G0 total	0.732168	0.088566	2.01367e-15	1.40957e-14
CD1	G1 total	-0.508996	0.105172	1.85567e-06	5.11714e-06
CD1	G2 total	-0.699398	0.0887129	3.00222e-14	1.78175e-13
CD1	G total	-0.791676	0.0896045	3.11984e-17	2.2637e-16
CD1	S total	-0.360916	0.0992275	0.000311314	0.000674514
CD1	B total	0.245621	0.083863	0.00359552	0.00691251
CD1	F total	-0.108263	0.103722	0.297214	0.352922
CD1	glycan age	4.47688	0.631456	6.05872e-12	2.75672e-11
CD2	G0 total	0.507039	0.06651	7.41336e-14	4.1303e-13
CD2	G1 total	-0.379596	0.0709833	1.18128e-07	3.62347e-07
CD2	G2 total	-0.474196	0.0655312	1.1352e-12	5.63472e-12
CD2	G total	-0.499389	0.0666859	1.94245e-13	9.32375e-13
CD2	S total	-0.29426	0.0677468	1.59341e-05	3.99084e-05
CD2	B total	-0.17107	0.0649133	0.00857699	0.0154435
CD2	F total	0.327743	0.0719024	6.01633e-06	1.56424e-05
CD2	glycan age	2.3717	0.335007	3.30808e-12	1.53069e-11
CD3	G0 total	0.672358	0.065213	1.58582e-23	1.4431e-22
CD3	G1 total	-0.0143562	0.0691156	0.835505	0.85428
CD3	G2 total	-0.672732	0.0640156	2.50775e-24	2.53561e-23
CD3	G total	-0.674158	0.0652361	1.2716e-23	1.07227e-22
CD3	S total	-0.501931	0.0658443	6.82241e-14	3.88024e-13
CD3	B total	0.297802	0.0628033	2.49523e-06	6.81199e-06
CD3	F total	0.370472	0.0673385	5.02457e-08	1.59501e-07
CD3	glycan age	1.86138	0.266762	6.16876e-12	2.76077e-11
CD4	G0 total	0.897918	0.10166	9.72077e-17	7.8052e-16
CD4	G1 total	-0.542977	0.120869	1.01627e-05	2.59291e-05
CD4	G2 total	-0.786836	0.102368	2.32011e-13	1.24194e-12
CD4	G total	-0.890067	0.105898	1.90531e-15	1.18891e-14
CD4	S total	-0.684399	0.108307	9.80568e-10	3.5223e-09
CD4	B total	0.43816	0.115186	0.000173463	0.000388159
CD4	F total	0.351852	0.122495	0.0043725	0.0083475
CD4	glycan age	1.96582	0.314227	1.40194e-09	4.97052e-09
RA1	G0 total	0.738932	0.107421	4.24985e-11	1.73166e-10
RA1	G1 total	-0.403685	0.120695	0.000941457	0.00190384
RA1	G2 total	-0.764172	0.103061	1.6043e-12	7.68376e-12
RA1	G total	-0.875971	0.106364	7.93788e-15	4.42254e-14
RA1	S total	-0.316725	0.118153	0.00780398	0.0142032
RA1	B total	0.198517	0.115355	0.0864186	0.122876
RA1	F total	-0.101	0.12524	0.420698	0.478544
RA1	glycan age	2.92624	0.518411	4.21014e-08	1.3683e-07
RA2	G0 total	0.875795	0.110713	5.98076e-14	3.47393e-13
RA2	G1 total	-0.352346	0.1423	0.0138749	0.023823
RA2	G2 total	-0.931564	0.106106	1.66073e-16	1.22535e-15
RA2	G total	-0.887046	0.116663	4.38086e-13	2.01004e-12
RA2	S total	-0.642945	0.118846	1.35432e-07	4.10811e-07
RA2	B total	0.353241	0.131335	0.00758253	0.0139867
RA2	F total	0.492216	0.141159	0.000567027	0.00117271
RA2	glycan age	3.57249	0.440399	1.5774e-14	9.78705e-14
RA3	G0 total	0.2882	0.126846	0.0242935	0.0404399
RA3	G1 total	-0.615042	0.132981	7.23205e-06	1.86259e-05
RA3	G2 total	-0.424095	0.122506	0.000673427	0.00137198
RA3	G total	-0.52574	0.123215	3.23242e-05	7.20367e-05
RA3	S total	0.238481	0.146176	0.104582	0.14523
RA3	B total	0.440585	0.141337	0.00213255	0.00415847
RA3	F total	0.200079	0.145545	0.170974	0.222266
RA3	glycan age	1.70439	0.606687	0.00552601	0.0104764
HT1	G0 total	0.434821	0.271053	0.115232	0.158081
HT1	G1 total	-0.0854637	0.313011	0.785996	0.809724
HT1	G2 total	-0.294222	0.283605	0.304731	0.357045
HT1	G total	-0.298028	0.282201	0.296217	0.34615
HT1	S total	-0.265273	0.279458	0.347252	0.401694
HT1	B total	0.919957	0.282704	0.00208693	0.00411178
HT1	F total	-0.461818	0.311653	0.14492	0.193937
HT1	glycan age	2.04465	1.78284	0.257128	0.31478
PsA1	G0 total	0.604324	0.0988838	3.1066e-09	1.07355e-08
PsA1	G1 total	-0.157517	0.1233	0.202423	0.25584
PsA1	G2 total	-0.619761	0.0978571	8.89412e-10	3.28121e-09
PsA1	G total	-0.560763	0.104455	1.60676e-07	4.35922e-07
PsA1	S total	-0.552163	0.102845	1.60336e-07	4.75778e-07
PsA1	B total	0.393941	0.113853	0.000619392	0.00127138
PsA1	F total	0.304688	0.122056	0.0130936	0.0227386
PsA1	glycan age	2.45502	0.375639	2.76621e-10	1.06363e-09
MS1	G0 total	0.0772846	0.113758	0.497838	0.546222
MS1	G1 total	-0.333681	0.147709	0.0251738	0.0411524
MS1	G2 total	-0.126143	0.112971	0.265768	0.322465
MS1	G total	-0.216178	0.121538	0.0771098	0.110868
MS1	S total	0.137587	0.124034	0.268911	0.324835
MS1	B total	0.357737	0.131667	0.00728224	0.0136168
MS1	F total	-0.623927	0.142972	2.23117e-05	5.39035e-05
MS1	glycan age	0.521418	0.855822	0.54318	0.588445
SjD1	G0 total	0.587333	0.124105	4.00729e-06	1.07254e-05
SjD1	G1 total	-0.839648	0.128513	4.54056e-10	1.72163e-09
SjD1	G2 total	-0.592371	0.122813	2.66402e-06	7.20078e-06
SjD1	G total	-0.710494	0.125723	4.99831e-08	1.46511e-07
SjD1	S total	-0.208538	0.128027	0.104799	0.14523
SjD1	B total	0.827786	0.124728	2.54741e-10	1.00789e-09
SjD1	F total	0.425746	0.136706	0.00209354	0.00411178
SjD1	glycan age	0.828925	0.641317	0.197552	0.252018
SSC1	G0 total	0.692038	0.121143	4.69487e-08	1.50788e-07
SSC1	G1 total	-0.78736	0.13453	2.33337e-08	7.76843e-08
SSC1	G2 total	-0.663317	0.118523	8.31111e-08	2.57833e-07
SSc1	G total	-0.701362	0.124536	6.99236e-08	2.00148e-07
SSC1	S total	-0.484268	0.134321	0.000406385	0.000853409
SSC1	B total	0.556366	0.137194	7.52626e-05	0.000169807
SSC1	F total	0.0736293	0.145977	0.614623	0.652887
SSC1	glycan age	2.42689	0.637403	0.000194026	0.000427171
GVHD1	G0 total	0.407693	0.320943	0.205105	0.258035
GVHD1	G1 total	-0.708885	0.322527	0.0288307	0.0465727
GVHD1	G2 total	-0.271065	0.321005	0.399201	0.457907
GVHD1	G total	-0.522451	0.322031	0.105929	0.143695
GVHD1	S total	-0.108262	0.32194	0.736928	0.767868
GVHD1	B total	0.603933	0.304155	0.0481187	0.075933
GVHD1	F total	-0.567834	0.318516	0.0757854	0.112557
GVHD1	glycan age	0.538677	0.730709	0.461661	0.510257
GVHD2	G0 total	0.396234	0.220888	0.0780547	0.114564
GVHD2	G1 total	-0.498476	0.216482	0.0249077	0.0409627
GVHD2	G2 total	-0.341184	0.227567	0.139229	0.187239
GVHD2	G total	-0.462357	0.212442	0.0336112	0.0529631
GVHD2	S total	-0.315515	0.239309	0.192539	0.246775
GVHD2	B total	-0.172611	0.232268	0.460387	0.510257
GVHD2	F total	-0.144301	0.250977	0.567544	0.61241
GVHD2	glycan age	1.80494	0.999998	0.076275	0.112557
COPD1	G0 total	0.323704	0.144328	0.0259881	0.0422307
COPD1	G1 total	-0.37438	0.184808	0.0440965	0.0703997
COPD1	G2 total	-0.346713	0.148023	0.0201342	0.0337217
COPD1	G total	-0.402227	0.151444	0.00853677	0.0149875
COPD1	S total	-0.16645	0.159305	0.297334	0.352922
COPD1	B total	0.43293	0.165204	0.00944181	0.0167378
COPD1	F total	-0.0838791	0.1876	0.655267	0.690686
COPD1	glycan age	1.54859	0.802114	0.0549206	0.0851894
COPD2	G0 total	0.133777	0.128488	0.298911	0.353174
COPD2	G1 total	-0.459132	0.127734	0.000399084	0.000844574
COPD2	G2 total	-0.0537372	0.127514	0.673847	0.707539
COPD2	G total	-0.245517	0.126631	0.0537658	0.0818289
COPD2	S total	0.103371	0.134312	0.442321	0.492872
COPD2	B total	0.222228	0.129758	0.0881506	0.12469
COPD2	F total	-0.236582	0.132733	0.0760284	0.112557
COPD2	glycan age	0.614701	0.40695	0.132311	0.178816
AS1	G0 total	-0.00605901	0.124599	0.96125	0.96125
AS1	G1 total	0.227605	0.123923	0.0673194	0.102101
AS1	G2 total	0.0698933	0.124862	0.576088	0.616754
AS1	G total	0.151248	0.124569	0.225705	0.275078
AS1	S total	-0.188406	0.123882	0.129426	0.175788
AS1	B total	0.0340182	0.123923	0.783895	0.809724
AS1	F total	0.178119	0.122682	0.147657	0.196636
AS1	glycan age	-0.00448257	0.00371923	0.229127	0.284326
AS2	G0 total	-0.0322044	0.0954715	0.736009	0.767868
AS2	G1 total	-0.123818	0.0862913	0.151907	0.199378
AS2	G2 total	0.0114546	0.0951534	0.904227	0.907552
AS2	G total	-0.0726003	0.0937823	0.439194	0.484337
AS2	S total	0.168166	0.0909839	0.0651119	0.0998626
AS2	B total	-0.0750019	0.0935686	0.423158	0.479345
AS2	F total	0.0125203	0.0931714	0.893153	0.899745
AS2	glycan age	-0.127549	0.0705618	0.0712284	0.107433
CVD1	G0 total	0.216005	0.0282441	2.45282e-14	1.48804e-13
CVD1	G1 total	-0.167582	0.032004	1.70811e-07	5.01412e-07
CVD1	G2 total	-0.182294	0.0281237	9.96582e-11	4.00098e-10
CVD1	G total	-0.184276	0.0290546	2.46901e-10	9.06271e-10
CVD1	S total	-0.232502	0.0293667	2.99241e-15	1.99251e-14
CVD1	B total	0.256191	0.0307646	1.06497e-16	8.30678e-16
CVD1	F total	-0.0321048	0.0328849	0.328975	0.383804
CVD1	glycan age	1.04428	0.168305	5.93957e-10	2.22124e-09
CAD1	G0 total	0.183273	0.104897	0.0815859	0.117846
CAD1	G1 total	-0.130484	0.112909	0.248703	0.305837
CAD1	G2 total	-0.181046	0.102896	0.0794669	0.116013
CAD1	G total	-0.164744	0.105135	0.118128	0.157505
CAD1	S total	-0.202987	0.110404	0.0669199	0.102062
CAD1	B total	0.231476	0.111009	0.0378581	0.0607957
CAD1	F total	-0.0629255	0.115074	0.584886	0.623726
CAD1	glycan age	0.501622	0.324959	0.123681	0.168825
HF1	G0 total	0.478113	0.110021	1.92933e-05	4.72475e-05
HF1	G1 total	-0.470285	0.116939	7.39512e-05	0.000168239
HF1	G2 total	-0.456768	0.110459	4.66203e-05	0.000108781
HF1	G total	-0.443185	0.111053	8.36872e-05	0.000177622
HF1	S total	-0.50127	0.114887	1.79019e-05	4.44292e-05
HF1	B total	0.0769817	0.114591	0.502253	0.54846
HF1	F total	0.513824	0.122124	3.45796e-05	8.13812e-05
HF1	glycan age	2.35891	0.646678	0.000314128	0.000675251
AF1	G0 total	-0.255393	0.146917	0.0835475	0.119416
AF1	G1 total	0.119823	0.15429	0.438223	0.491533
AF1	G2 total	0.17315	0.146381	0.238137	0.29417
AF1	G total	0.202382	0.147498	0.171429	0.217423
AF1	S total	0.25268	0.15287	0.0997757	0.139686
AF1	B total	-0.393985	0.144047	0.00674438	0.012698
AF1	F total	0.026219	0.157463	0.867909	0.880255
AF1	glycan age	-0.570173	0.509922	0.264719	0.322465
T2D1	G0 total	0.380778	0.0371065	2.93251e-24	2.8592e-23
T2D1	G1 total	-0.573626	0.0392822	1.58826e-46	2.55056e-45
T2D1	G2 total	-0.266825	0.0371735	9.13373e-13	4.70473e-12
T2D1	G total	-0.421608	0.0373742	7.25088e-29	8.37879e-28
T2D1	S total	-0.223495	0.039161	1.27558e-08	4.29917e-08
T2D1	B total	0.420005	0.0395781	8.46827e-26	9.24735e-25
T2D1	F total	0.0839012	0.0417415	0.0445294	0.0706774
T2D1	glycan age	1.02755	0.153775	2.85325e-11	1.19836e-10
DM1	G0 total	0.297011	0.0267911	3.20416e-28	3.8032e-27
DM1	G1 total	-0.333834	0.0302646	5.86785e-28	6.67468e-27
DM1	G2 total	-0.241671	0.0267437	2.29537e-19	1.95824e-18
DM1	G total	-0.297254	0.0275258	7.04431e-27	7.08976e-26
DM1	S total	-0.241438	0.028006	8.88536e-18	7.35062e-17
DM1	B total	0.230281	0.0293981	5.80966e-15	3.68846e-14
DM1	F total	0.0612327	0.0313892	0.051144	0.0797846
DM1	glycan age	1.14627	0.160491	1.05513e-12	5.33426e-12
CRC1	G0 total	0.619071	0.0509843	3.31089e-32	4.51937e-31
CRC1	G1 total	-0.319099	0.0556717	1.23529e-08	4.21542e-08
CRC1	G2 total	-0.695513	0.0499421	3.5165e-41	5.33335e-40
CRC1	G total	-0.668107	0.0514306	2.34429e-36	3.18008e-35
CRC1	S total	-0.33237	0.0539374	9.56918e-10	3.48318e-09
CRC1	B total	-0.0593861	0.0546555	0.277437	0.333657
CRC1	F total	0.0924538	0.0557792	0.0976617	0.137431
CRC1	glycan age	1.09421	0.0923342	7.89552e-31	1.02642e-29
Aging1	G0 total	0.370906	0.0173045	1.87399e-82	4.26333e-81
Aging1	G1 total	-0.110959	0.0209343	1.45945e-07	4.37835e-07
Aging1	G2 total	-0.385642	0.016949	1.2416e-90	3.38958e-89
Aging1	G total	-0.357557	0.0176311	2.00686e-75	4.17428e-74
Aging1	S total	-0.208837	0.0201298	7.0461e-24	6.63306e-23
Aging1	B total	0.226219	0.0197921	2.55078e-28	3.16529e-27
Aging1	F total	-0.0337858	0.0212834	0.112774	0.155492
Aging1	glycan age	3.89057	0.163469	3.25475e-97	9.87275e-96
Aging2	G0 total	0.389771	0.0194587	2.9681e-74	5.40194e-73
Aging2	G1 total	-0.0624286	0.0232607	0.00740959	0.0137607
Aging2	G2 total	-0.399541	0.0192046	5.66026e-79	1.18865e-77
Aging2	G total	-0.349645	0.0202769	6.92928e-58	1.08097e-56
Aging2	S total	-0.218189	0.0222445	1.16392e-21	1.025e-20
Aging2	B total	0.269528	0.0215658	3.3795e-33	4.85581e-32
Aging2	F total	0.0180923	0.0233846	0.439319	0.491533
Aging2	glycan age	3.57214	0.159066	2.98033e-89	7.39664e-88
Aging3	G0 total	0.449744	0.0103906	2.01637e-290	1.83489e-288
Aging3	G1 total	0.025307	0.0144872	0.080815	0.117354
Aging3	G2 total	-0.45218	0.010387	7.36224e-293	1.00495e-290
Aging3	G total	-0.411084	0.0112511	5.51369e-225	4.30068e-223
Aging3	S total	-0.3568	0.0121018	2.71693e-159	1.48344e-157
Aging3	B total	0.377025	0.0118767	7.14325e-180	4.87527e-178
Aging3	F total	-0.0286554	0.0145232	0.0486222	0.0762865
Aging3	glycan age	4.95824	0.109563	0	2.93549e-307
Aging4	G0 total	0.633287	0.0244374	5.87772e-118	2.29231e-116
Aging4	G1 total	0.150461	0.0301511	6.91964e-07	1.96777e-06
Aging4	G2 total	-0.6082	0.0249627	7.44337e-107	2.54005e-105
Aging4	G total	-0.513769	0.0266388	2.07295e-72	3.59311e-71
Aging4	S total	-0.521692	0.0265584	1.04381e-74	2.03543e-73
Aging4	B total	0.47262	0.0273126	4.60613e-60	7.85921e-59
Aging4	F total	0.0725366	0.0304567	0.0173914	0.0294898
Aging4	glycan age	4.00229	0.141468	2.51862e-135	1.14597e-133

## Sheet: ST3
ST3: Association between glycan age and risk of overall mortality in the GCKD cohort: Cox proportional hazards models with sequential adjustment. Associations between glycan age and overall mortality are shown across sequentially adjusted models. M0 (Model 0): unadjusted. M1 (Model 1): adjusted for age and sex. M2 (Model 2): additionally adjusted for body mass index (BMI), smoking status, systoli…
Regressor	M0	M1	M2	M3	M4
Glycan age	1.13 (1.11-1.15)	1.1 (1.08-1.12)	1.08 (1.07-1.1)	1.07 (1.05-1.08)	1.05 (1.03-1.06)
Age		1.06 (1.05-1.07)	1.05 (1.04-1.06)	1.05 (1.04-1.06)	1.05 (1.04-1.06)
Sex (female)		0.43 (0.37-0.5)	0.56 (0.47-0.66)	0.56 (0.47-0.66)	0.56 (0.47-0.66)
BMI			1 (0.99-1.02)	0.99 (0.98-1.01)	0.99 (0.98-1.01)
Smoking: Ex-Smoker			1.35 (1.14-1.59)	1.32 (1.12-1.56)	1.27 (1.08-1.5)
Smoking: Smoker			1.9 (1.53-2.36)	1.76 (1.42-2.19)	1.61 (1.29-2)
Syst. blood pressure			1 (1-1)	1 (1-1)	1 (1-1)
log(LDL)			0.77 (0.65-0.92)	0.75 (0.63-0.89)	0.78 (0.66-0.93)
Cardiovascular			1.64 (1.42-1.89)	1.6 (1.39-1.84)	1.5 (1.3-1.73)
disease: Yes
Diabetes: Yes			1.84 (1.58-2.14)	1.83 (1.57-2.13)	1.8 (1.55-2.1)
log(CRP)				1.26 (1.18-1.35)	1.24 (1.16-1.32)
log(eGFR)					0.32 (0.25-0.42)
log(UACR)					1.07 (1.04-1.11)

## Sheet: ST4
ST4: Detailed Cox proportional hazards regression results for overall mortality in the GCKD cohort. Associations between glycan age and overall mortality are shown across sequentially adjusted models. M0 (Model 0): unadjusted. M1 (Model 1): adjusted for age and sex. M2 (Model 2): additionally adjusted for body mass index (BMI), smoking status, systolic blood pressure, log low density lipoprotein …
Stratum	Event	Model name	Regressor	β	Exp (β)	SE (β)	CI lower (95%)	CI upper (95%)	P value (β)	N (total)	N (events)
Overall	Overall mortality	M0	Glycan age	0.12071	1.1283	0.00771788	1.11136	1.14549	3.87043e-55	4827	840
Overall	Overall mortality	M1	Glycan age	0.0962778	1.10106	0.00855745	1.08275	1.11969	2.29627e-29	4827	840
Overall	Overall mortality	M1	Age	0.056869	1.05852	0.00494405	1.04831	1.06882	1.28153e-30	4827	840
Overall	Overall mortality	M1	Sex (female)	-0.84465	0.429708	0.0814069	0.366336	0.504042	3.19999e-25	4827	840
Overall	Overall mortality	M2	Glycan age	0.0813999	1.0848	0.00863577	1.0666	1.10332	4.26472e-21	4827	840
Overall	Overall mortality	M2	Sex (female)	-0.579424	0.560221	0.0868099	0.47257	0.664128	2.47849e-11	4827	840
Overall	Overall mortality	M2	Age	0.049949	1.05122	0.00528481	1.04039	1.06216	3.34239e-21	4827	840
Overall	Overall mortality	M2	BMI	0.0035394	1.00355	0.00647408	0.990892	1.01636	0.584583	4827	840
Overall	Overall mortality	M2	Smoking: Ex-Smoker	0.298473	1.3478	0.0840736	1.14304	1.58924	0.000385033	4827	840
Overall	Overall mortality	M2	Smoking: Smoker	0.640451	1.89734	0.111142	1.52595	2.35911	8.28845e-09	4827	840
Overall	Overall mortality	M2	Syst. blood pressure	0.000417465	1.00042	0.00171192	0.997066	1.00378	0.80734	4827	840
Overall	Overall mortality	M2	log(LDL)	-0.255763	0.774325	0.0888546	0.650564	0.92163	0.00399637	4827	840
Overall	Overall mortality	M2	Cardiovascular disease: Yes	0.494394	1.6395	0.0726285	1.42197	1.89031	9.95445e-12	4827	840
Overall	Overall mortality	M2	Diabetes: Yes	0.607233	1.83535	0.077227	1.57755	2.13527	3.75129e-15	4827	840
Overall	Overall mortality	M3	Glycan age	0.0636883	1.06576	0.00885197	1.04743	1.08441	6.25433e-13	4827	840
Overall	Overall mortality	M3	Sex (female)	-0.583347	0.558027	0.086906	0.470632	0.661653	1.91463e-11	4827	840
Overall	Overall mortality	M3	Age	0.0514156	1.05276	0.00528905	1.0419	1.06373	2.45005e-22	4827	840
Overall	Overall mortality	M3	BMI	-0.00620825	0.993811	0.00663522	0.98097	1.00682	0.349453	4827	840
Overall	Overall mortality	M3	Smoking: Ex-Smoker	0.280742	1.32411	0.0840893	1.12292	1.56135	0.000841964	4827	840
Overall	Overall mortality	M3	Smoking: Smoker	0.565755	1.76078	0.111442	1.41529	2.19061	3.84128e-07	4827	840
Overall	Overall mortality	M3	Syst. blood pressure	0.000746467	1.00075	0.00170501	0.997408	1.0041	0.661526	4827	840
Overall	Overall mortality	M3	log(LDL)	-0.292899	0.746098	0.089177	0.626452	0.888594	0.00102176	4827	840
Overall	Overall mortality	M3	Cardiovascular disease: Yes	0.469676	1.59948	0.072641	1.38722	1.84421	1.00823e-10	4827	840
Overall	Overall mortality	M3	Diabetes: Yes	0.604181	1.82975	0.0771013	1.57313	2.12824	4.64397e-15	4827	840
Overall	Overall mortality	M3	log(CRP)	0.232535	1.2618	0.03323	1.18223	1.34671	2.60081e-12	4827	840
Overall	Overall mortality	M4	Glycan age	0.0450382	1.04607	0.0089086	1.02796	1.06449	4.29076e-07	4827	840
Overall	Overall mortality	M4	Sex (female)	-0.582778	0.558345	0.0885793	0.469358	0.664204	4.73106e-11	4827	840
Overall	Overall mortality	M4	Age	0.0467596	1.04787	0.00539931	1.03684	1.05902	4.70555e-18	4827	840
Overall	Overall mortality	M4	BMI	-0.00554612	0.994469	0.0065035	0.981874	1.00723	0.393776	4827	840
Overall	Overall mortality	M4	Smoking: Ex-Smoker	0.24053	1.27192	0.0844314	1.07794	1.50082	0.00438819	4827	840
Overall	Overall mortality	M4	Smoking: Smoker	0.47588	1.60943	0.111769	1.29281	2.0036	2.06534e-05	4827	840
Overall	Overall mortality	M4	Syst. blood pressure	-0.000925242	0.999075	0.00174576	0.995663	1.0025	0.596117	4827	840
Overall	Overall mortality	M4	log(LDL)	-0.24661	0.781445	0.0889203	0.656462	0.930224	0.0055476	4827	840
Overall	Overall mortality	M4	Cardiovascular disease: Yes	0.405097	1.49945	0.0734133	1.2985	1.73149	3.42822e-08	4827	840
Overall	Overall mortality	M4	Diabetes: Yes	0.589317	1.80276	0.0776181	1.54835	2.09897	3.13744e-14	4827	840
Overall	Overall mortality	M4	log(CRP)	0.212399	1.23664	0.0330647	1.15904	1.31944	1.32974e-10	4827	840
Overall	Overall mortality	M4	log(eGFR)	-1.12679	0.324073	0.126199	0.253059	0.415015	4.31297e-19	4827	840
Overall	Overall mortality	M4	log(UACR)	0.0706816	1.07324	0.0180252	1.03599	1.11183	8.8082e-05	4827	840

## Sheet: ST5
ST5: Detailed Cox proportional hazards regression results for overall mortality in the Vis cohort. Associations between glycan age and overall mortality are shown across sequentially adjusted models. M0 (Model 0): unadjusted. M1 (Model 1): adjusted for age and sex. M2 (Model 2): additionally adjusted for body mass index (BMI), smoking status, systolic blood pressure, diabetes, and log low density…
Model name	Regressor	β	Exp (β)	SE (β)	CI lower (95%)	CI upper (95%)	P value (β)	N (total)	N (events)
M0	glycan age	0.0870315	1.09093	0.0123175	1.06491	1.11759	1.59808e-12	796	94
M1	glycan age	0.0317325	1.03224	0.015108	1.00212	1.06326	0.035696	796	94
M1	Age	0.0839574	1.08758	0.0112549	1.06385	1.11184	8.67851e-14	796	94
M1	SexFemale	-0.772206	0.461993	0.209096	0.306657	0.696014	0.000221557	796	94
M2	glycan age	0.030603	1.03108	0.0152204	1.00077	1.0623	0.0443618	796	94
M2	Age	0.0819317	1.08538	0.0122925	1.05954	1.11185	2.64312e-11	796	94
M2	SexFemale	-0.82317	0.439038	0.23389	0.277597	0.694367	0.000432402	796	94
M2	BMI	0.00414606	1.00415	0.0282708	0.950028	1.06136	0.883404	796	94
M2	smokingex_smoker	-0.141904	0.867705	0.253519	0.527929	1.42616	0.575659	796	94
M2	smokingcurrent	0.221779	1.2483	0.32329	0.662418	2.35235	0.49271	796	94
M2	sbp	0.00751182	1.00754	0.00446863	0.998754	1.0164	0.0927611	796	94
M2	diabetes	0.351537	1.42125	0.292307	0.801416	2.52048	0.22912	796	94
M2	log(ldl)	0.0174653	1.01762	0.39733	0.467065	2.21714	0.964939	796	94
M3	glycan age	0.0239608	1.02425	0.0149401	0.994693	1.05469	0.10876	796	94
M3	Age	0.0825038	1.086	0.0123595	1.06001	1.11263	2.46648e-11	796	94
M3	SexFemale	-0.790136	0.453783	0.239129	0.283989	0.725096	0.00095239	796	94
M3	BMI	-0.00800876	0.992023	0.0280262	0.939001	1.04804	0.775062	796	94
M3	smokingex_smoker	-0.251449	0.777673	0.261336	0.465959	1.29792	0.335965	796	94
M3	smokingcurrent	0.209276	1.23279	0.327905	0.648298	2.34423	0.523328	796	94
M3	sbp	0.0075761	1.0076	0.00440538	0.998942	1.01634	0.08548	796	94
M3	diabetes	0.482229	1.61968	0.291544	0.914676	2.86808	0.0981161	796	94
M3	log(ldl)	-0.1968	0.821355	0.404771	0.371526	1.81582	0.626825	796	94
M3	log(CRP)	0.373482	1.45278	0.1069	1.17817	1.79141	0.000476316	796	94

## Sheet: ST6
ST6: Mean glycan age according to survival status within strata of chronological age in the GCKD and Vis cohorts. Mean glycan age (GA) is shown for participants who survived (control) and those who died (case) during follow-up, stratified by baseline chronological age groups. N denotes the number of participants in each subgroup. P values correspond to comparisons of glycan age between survivors …
GCKD
Age range	N (control)	N (dead)	Mean GA (control)	Mean GA (case)	P value
20-44	180	8	52.2292	59.5252	0.00644
45-64	1743	255	59.2651	62.3164	4.7e-17
65-75	1674	577	62.071	63.6184	1.89e-13
Vis
Age range	N (control)	N (dead)	Mean GA (control)	Mean GA (case)	P value
20-44	178	1	46.9873	47.0421
45-64	306	16	55.418	62.1123	0.00750582
65-75	161	48	61.3174	61.3439	0.981854
>75	48	29	63.7225	65.7555	0.166099

## Sheet: ST7
ST7: Descriptive characteristics of participants in the menopause study from the Vis and Korčula cohorts. Descriptive statistics are shown for participants stratified by menopausal status (No/Yes) and cohort (Korčula and Vis), in the full sample and matched subsets. Continuous variables are presented as median (Q1, Q3) and range (min, max), and categorical variables as counts (percentages). N den…
	Korčula				Vis
	All		Matched		All		Matched
Characteristic	No N = 1891	Yes N = 2671	No N = 531	Yes N = 531	No N = 1661	Yes N = 2011	No N = 421	Yes N = 421
gender
Male	0 (0%)	0 (0%)	0 (0%)	0 (0%)	0 (0%)	0 (0%)	0 (0%)	0 (0%)
Female	189 (100%)	267 (100%)	53 (100%)	53 (100%)	166 (100%)	201 (100%)	42 (100%)	42 (100%)
Age, years
Median (Q1, Q3)	42 (35, 48)	58 (55, 63)	50.0 (49.0, 52.0)	51.0 (49.0, 54.0)	41 (33, 45)	58 (54, 65)	48.5 (46.0, 50.0)	49.0 (46.0, 51.0)
Min, Max	18, 59	44, 69	44.0, 59.0	44.0, 59.0	18, 55	43, 69	43.0, 55.0	43.0, 55.0
Glycan age, years
Median (Q1, Q3)	42 (37, 49)	60 (55, 66)	45 (39, 51)	56 (50, 61)	42 (37, 49)	61 (55, 66)	46 (40, 54)	56 (48, 63)
Min, Max	17, 80	34, 82	25, 80	40, 70	19, 79	33, 83	29, 79	33, 71
BMI, kg / m2
Median (Q1, Q3)	24.6 (22.5, 27.1)	28.1 (25.8, 30.9)	26.3 (24.5, 28.5)	26.4 (24.0, 28.7)	23.7 (21.9, 27.9)	28.3 (25.4, 30.8)	26.8 (25.0, 30.0)	27.3 (24.6, 32.4)
Min, Max	18.4, 34.9	18.9, 53.8	21.5, 34.5	18.9, 39.2	17.0, 40.2	19.0, 52.0	19.1, 40.2	19.0, 52.0
Age at menopause, years
Median (Q1, Q3)	NA (NA, NA)	50.0 (48.0, 52.0)	NA (NA, NA)	49.00 (47.00, 50.00)	NA (NA, NA)	49.0 (45.0, 51.0)	NA (NA, NA)	46.0 (43.0, 48.0)
Min, Max	Inf, -Inf	36.0, 59.0	Inf, -Inf	40.00, 56.00	Inf, -Inf	30.0, 68.0	Inf, -Inf	36.0, 54.0
Unknown	189	0	53	0	166	0	42	0
Regular menstrual cycle, Yes	189 (100%)	0 (0%)	53 (100%)	0 (0%)	166 (100%)	0 (0%)	42 (100%)	0 (0%)
Unknown					1	0	1	0
1n (%)
									<

## Sheet: ST8
ST8: Overview of participants and sampling structure in the hormone replacement therapy (HRT) study. Longitudinal sampling information is shown for each study participant, including sample collection date, study subject identifier, and sample identifier. Hormone exposure status (estrogen, progesterone, testosterone) at the time of sampling is indicated (YES/NO). Menopausal status (perimenopause, …
Date of Sample	Study subject identifier	Sample identifier	Estrogen	Progesterone	Testosterone	Menopause	Chronological age
20210127	HRT001	GA006-19-1716	NO	NO	NO	PERIMENOPAUSE	49
20210708	HRT001	GA006-19-2521	YES	YES	NO	PERIMENOPAUSE	50
20210307	HRT002	GA006-19-1910	NO	NO	NO	NATURAL MENOPAUSE	61
20210728	HRT002	GA006-19-1911	YES	YES	YES	NATURAL MENOPAUSE	61
20220202	HRT002	GA006-19-2013	YES	YES	YES	NATURAL MENOPAUSE	61
20210308	HRT003	GA006-19-1914	NO	NO	NO	NATURAL MENOPAUSE	54
20220103	HRT003	GA006-19-1913	YES	YES	YES	NATURAL MENOPAUSE	55
20220317	HRT003	GA006-19-1912	YES	YES	YES	NATURAL MENOPAUSE	55
20210204	HRT004	GA006-19-1727	NO	NO	NO	NATURAL MENOPAUSE	48
20211007	HRT004	GA006-19-2505	YES	YES	YES	NATURAL MENOPAUSE	49
20220125	HRT004	GA006-21-2152	YES	YES	YES	NATURAL MENOPAUSE	49
20220404	HRT004	GA-005012	YES	YES	YES	NATURAL MENOPAUSE	50
20220827	HRT005	GA-UK-006541	NO	NO	NO	NATURAL MENOPAUSE	52
20221127	HRT005	GA-UK-007969	YES	YES	NO	NATURAL MENOPAUSE	52
20230803	HRT005	GA-UK-010884	YES	YES	YES	NATURAL MENOPAUSE	53
20210217	HRT006	GA006-19-1943	NO	NO	NO	PERIMENOPAUSE	53
20210601	HRT006	GA006-19-1941	YES	YES	NO	NATURAL MENOPAUSE	53
20210906	HRT006	GA006-19-1942	YES	YES	YES	NATURAL MENOPAUSE	54
20210517	HRT007	GA006-19-2488	NO	NO	NO	SURGICAL MENOPAUSE	58
20220110	HRT007	GA006-19-2487	YES	NO	YES	SURGICAL MENOPAUSE	59
20220620	HRT007	GA006-19-2489	YES	NO	YES	SURGICAL MENOPAUSE	59
20220503	HRT008	GA-005122	NO	NO	NO	PERIMENOPAUSE	55
20220905	HRT008	GA-005120	YES	YES	NO	NATURAL MENOPAUSE	55
20230130	HRT008	GA-005121	YES	YES	NO	NATURAL MENOPAUSE	56
20230517	HRT008	GA-UK-008754	YES	YES	NO	NATURAL MENOPAUSE	56
20210708	HRT009	GA006-19-2283	NO	NO	NO	NATURAL MENOPAUSE	53
20220217	HRT009	GA006-19-2992	YES	YES	YES	NATURAL MENOPAUSE	54
20220530	HRT009	GA006-19-3001	YES	YES	YES	NATURAL MENOPAUSE	54
20210908	HRT010	GA006-19-2627	NO	NO	NO	NATURAL MENOPAUSE	51
20220208	HRT010	GA006-19-2881	YES	YES	YES	NATURAL MENOPAUSE	51
20221024	HRT010	GA006-19-2882	YES	YES	YES	NATURAL MENOPAUSE	52
20210410	HRT011	GA006-19-2096	NO	NO	NO	PERIMENOPAUSE	45
20210802	HRT011	GA006-19-2677	YES	YES	NO	PERIMENOPAUSE	45
20211204	HRT011	GA006-19-3233	YES	YES	YES	PERIMENOPAUSE	46
20210516	HRT012	GA006-19-2114	NO	NO	NO	PERIMENOPAUSE	47
20210824	HRT012	GA006-19-2113	YES	YES	NO	PERIMENOPAUSE	47
20211123	HRT012	GA006-19-2112	YES	YES	YES	PERIMENOPAUSE	47
20220720	HRT012	GA-005878	YES	YES	YES	PERIMENOPAUSE	48
20210712	HRT013	GA006-19-2691	YES	NO	YES	SURGICAL MENOPAUSE	58
20211011	HRT013	GA006-19-3547	YES	NO	YES	SURGICAL MENOPAUSE	59
20210602	HRT014	GA006-19-2386	NO	NO	NO	SURGICAL MENOPAUSE	55
20211025	HRT014	GA006-19-3028	YES	NO	YES	SURGICAL MENOPAUSE	55
20220407	HRT014	GA006-19-3029	YES	NO	YES	SURGICAL MENOPAUSE	56
20210308	HRT015	GA006-19-1845	NO	NO	NO	NATURAL MENOPAUSE	55
20210923	HRT015	GA006-19-1847	YES	YES	YES	NATURAL MENOPAUSE	56
20220316	HRT015	GA006-19-1846	YES	YES	YES	NATURAL MENOPAUSE	56
20210309	HRT016	GA006-19-1786	NO	NO	NO	PERIMENOPAUSE	48
20210927	HRT016	GA006-19-2682	YES	YES	NO	PERIMENOPAUSE	49
20220125	HRT016	GA006-21-2033	YES	YES	YES	PERIMENOPAUSE	49
20210601	HRT017	GA006-19-2294	NO	NO	NO	NATURAL MENOPAUSE	51
20211101	HRT017	GA006-19-3027	YES	YES	YES	NATURAL MENOPAUSE	51
20210907	HRT018	GA006-19-2400	NO	NO	NO	NATURAL MENOPAUSE	52
20220223	HRT018	GA006-21-2107	YES	YES	YES	NATURAL MENOPAUSE	52
20210311	HRT019	GA006-19-1939	NO	NO	NO	NATURAL MENOPAUSE	56
20220201	HRT019	GA006-19-1938	YES	YES	YES	NATURAL MENOPAUSE	57

## Sheet: ST9
ST9: Descriptive characteristics of participants in the intervention studies. Descriptive statistics are shown for participants across intervention studies, stratified by study, intervention type, and sex (F - female; M - male). N (type) denotes the number of participants within each sex, and N (total) the total number of participants per study. Age is presented as mean, standard deviation (SD), …
Study	Intervention	Sex	N (type)	N (total)	Age (mean)	Age (SD)	Age (min)	Age (max)	Age (median)
HRT	Hormone replacement therapy	F	19	19	52.6	4.15	45	61	53
		M	N/A		N/A	N/A	N/A	N/A	N/A
TPE	Therapeutic plasma exchange	F	4	9	61.5	13.2	43	72	65,5
		M	5		60.2	6.1	53	66	61
Diogenes (Cambridge, HNR)	Caloric restriction	F	49	67	42.8367	7.60303	26	58	42
		M	18		39.9444	5.74428	29	49	40
Diogenes (Heraklion, UoC)	Caloric restriction	F	42	67	37.4048	5.34224	29	51	37
		M	25		40.44	5.26846	28	51	40
Diogenes (Maastricht, UM)	Caloric restriction	F	68	113	41.2353	5.76173	27	53	41
		M	45		44	5.55959	33	57	44
Diogenes (Sofia, NMTI)	Caloric restriction	F	61	85	42.3279	7.8501	24	56	42
		M	24		42.7917	6.2761	30	56	43.5
Diogenes (Potsdam, POT)	Caloric restriction	F	45	76	40.3111	5.42646	25	51	40
		M	31		42.129	6.31792	28	60	42
Diogenes (Pamplona, UNAV)	Caloric restriction	F	38	69	41.8158	4.9092	30	54	41.5
		M	31		44.0323	5.79358	37	63	43
Diogenes (Copenhagen, RVAU)	Caloric restriction	F	70	121	41.5571	5.12351	29	54	42
		M	51		41.8235	5.66994	31	59	42
Diogenes (Prague, CU)	Caloric restriction	F	61	82	39.7869	6.70103	29	54	39
		M	21		43.4762	6.36882	32	60	42

[truncated: 5 more sheets: ST10, ST11, ST12, ST13, ST14]
